# Supplementary material
Source: ML conference proceedings conference paper supplement (https://proceedings.mlr.press/v54/rakhlin17a.html)
Supplement: Supplementary file [file rakhlin17a-supp.pdf]

## A Proof of Admissibility

*Proof of Lemma 1.* Define functions  $\mathbf{Rel}_n : \cup_t [k]^t \rightarrow \mathbb{R}$  as

$$\mathbf{Rel}_n(y_1, \dots, y_n) = -\phi(y_1, \dots, y_n)$$

and

$$\mathbf{Rel}_n(y_1, \dots, y_{t-1}) = \mathbb{E}_{y_t \sim \text{Unif}[k]} \mathbf{Rel}_n(y_1, \dots, y_t) + \frac{1}{n} \left(1 - \frac{1}{k}\right), \quad (31)$$

with  $\mathbf{Rel}_n(\emptyset)$  being a constant. We desire to prove that there is an algorithm such that

$$\forall \mathbf{y} \in [k]^n, \quad \mathbb{E} \left[ \frac{1}{n} \sum_{t=1}^n \mathbf{1} \{ \hat{y}_t \neq y_t \} \right] - \phi(y_1, \dots, y_n) = 0.$$

Consider the last time step  $n$  and write the above expression as

$$\mathbb{E} \left[ \frac{1}{n} \sum_{t=1}^{n-1} \mathbf{1} \{ \hat{y}_t \neq y_t \} + \frac{1}{n} \mathbf{1} \{ \hat{y}_n \neq y_n \} + \mathbf{Rel}_n(y_1, \dots, y_n) \right]. \quad (32)$$

Let  $\mathbb{E}_{n-1}$  denote the conditional expectation given  $\hat{y}_1, \dots, \hat{y}_{n-1}$ . We shall prove that there exists a randomized strategy for the last step such that for any  $y_n \in [k]$ ,

$$\mathbb{E}_{n-1} \left[ \frac{1}{n} \mathbf{1} \{ \hat{y}_n \neq y_n \} \right] + \mathbf{Rel}_n(y_1, \dots, y_n) = \mathbf{Rel}_n(y_1, \dots, y_{n-1}). \quad (33)$$

This last statement is translated as

$$\min_{q_n \in \Delta_k} \max_{y_n \in [k]} \left\{ \mathbb{E}_{n-1} \left[ \frac{1}{n} \mathbf{1} \{ \hat{y}_n \neq y_n \} \right] + \mathbf{Rel}_n(y_1, \dots, y_n) \right\} = \mathbf{Rel}_n(y_1, \dots, y_{n-1}). \quad (34)$$

Writing  $\mathbf{1} \{ \hat{y}_n \neq y_n \} = 1 - e_{\hat{y}_n}^\top e_{y_n}$ , the left-hand side of (34) is

$$\frac{1}{n} \min_{q_n \in \Delta_k} \max_{y_n \in [k]} \{ 1 - q_n^\top e_{y_n} + n \mathbf{Rel}_n(y_1, \dots, y_n) \}. \quad (35)$$

The stability condition means that we can choose  $q_n$  to *equalize* the choices of  $y_n$ . Let  $\psi(1), \dots, \psi(k)$  be the *sorted* values of

$$n \mathbf{Rel}_n(y_1, \dots, y_{n-1}, 1), \dots, n \mathbf{Rel}_n(y_1, \dots, y_{n-1}, k),$$

in non-increasing order. In view of the stability condition,

$$\sum_{i=1}^k (\psi(i) - \psi(k)) \leq 1.$$

Hence,  $q_n$  can be chosen so that all  $\psi(i) - q_n(i)$  have the same value. One can check that this is the minimizing choice for  $q_n$ . Let  $q_n^*$  denote this optimal choice. The common value of  $\psi(i) - q_n^*(i)$  can then be written as

$$\psi(k) - \frac{1}{k} \left( 1 - \sum_{i=1}^k (\psi(i) - \psi(k)) \right) = \frac{1}{k} \sum_{i=1}^k \psi(i) - \frac{1}{k}$$

and hence (35) is equal to

$$\frac{1}{n} \left( 1 - \frac{1}{k} \right) + \frac{1}{k} \sum_{i=1}^k \mathbf{Rel}_n(y_1, \dots, y_{n-1}, i). \quad (36)$$

This value is precisely  $\mathbf{Rel}_n(y_1, \dots, y_{n-1})$ , as per Eq. (31), thus verifying (34). Repeating the argument for  $t = n - 1$  until  $t = 0$ , we find that

$$\mathbf{Rel}_n(\emptyset) = -\mathbb{E}\phi + \left( 1 - \frac{1}{k} \right) = 0,$$

thus ensuring existence of an algorithm with (32) equal to zero. The other direction of the statement is proved by taking sequences  $\mathbf{y}$  uniformly at random from  $[k]^n$ , concluding the proof.  $\square$

**Proof of Lemma 5.** Recall that

$$Y_t = [\nabla_1, \dots, \nabla_t, \mathbf{0}, \dots, \mathbf{0}]^\top.$$

We can write

$$\begin{aligned} \mathbf{Rel}_n(\nabla_1, \dots, \nabla_t) &= \sqrt{\sum_{i=1}^k (Y_t^i)^\top M Y_t^i + D^2 \sum_{j=t+1}^n M[j, j]} \\ &= \sqrt{\sum_{i=1}^k (Y_{t-1}^i)^\top M Y_{t-1}^i + 2\nabla_t[i] M[t, :] Y_{t-1}^i + \nabla_t^2[i] M[t, t] + D^2 \sum_{j=t+1}^n M[j, j]} \\ &\leq \sqrt{\sum_{i=1}^k ((Y_{t-1}^i)^\top M Y_{t-1}^i + 2\nabla_t[i] M[t, :] Y_{t-1}^i) + D^2 M[t, t] + D^2 \sum_{j=t+1}^n M[j, j]} \end{aligned}$$

since  $\|\nabla_t\|_2^2 \leq D^2$ . Hence,

$$\begin{aligned} &\inf_{\psi_t \in \mathbb{R}^k} \sup_{\|\nabla_t\| \leq D} \{\nabla_t^\top \psi_t + \mathbf{Rel}_n(\nabla_1, \dots, \nabla_t)\} \\ &\leq \inf_{\psi_t \in \mathbb{R}^k} \sup_{\|\nabla_t\| \leq D} \left\{ \nabla_t^\top \psi_t + \sqrt{\sum_{i=1}^k ((Y_{t-1}^i)^\top M Y_{t-1}^i + 2\nabla_t[i] M[t, :] Y_{t-1}^i) + D^2 \sum_{j=t}^n M[j, j]} \right\} \end{aligned}$$

Now the claim is that

$$\psi_t = -\frac{M[t, :] Y_{t-1}}{\sqrt{\sum_{i=1}^k (Y_{t-1}^i)^\top M Y_{t-1}^i + D^2 \sum_{j=t}^n M[j, j]}}$$

is the solution to the above minimization problem. To see this, note that for the given  $\psi_t$ , the gradient with respect to  $\nabla_t$  is 0 and hence this  $\nabla_t$  is the maximizer. Plugging in this solution we get an upper bound on the value

$$\begin{aligned} &\sup_{\|\nabla_t\| \leq D} \left\{ \nabla_t^\top \psi_t + \sqrt{\sum_{i=1}^k ((Y_{t-1}^i)^\top M Y_{t-1}^i + 2\nabla_t[i] M[t, :] Y_{t-1}^i) + D^2 \sum_{j=t}^n M[j, j]} \right\} \\ &\leq \sqrt{\sum_{i=1}^k ((Y_{t-1}^i)^\top M Y_{t-1}^i) + D^2 \sum_{j=t}^n M[j, j]} \\ &= \mathbf{Rel}_n(\nabla_1, \dots, \nabla_{t-1}). \end{aligned}$$

The bound at the end is given by

$$\mathbf{Rel}_n(\emptyset) = D\sqrt{\text{trace}(M)}.$$

Now once the matrix  $M$  is pre-computed, the time complexity per round is  $O(t)$ . □
